# Supplementary material
Source: PubMed Central journal article supplement (PMC3556934)
Supplement: neo1501_0001SD1.pdf [file neo1501_0001SD1.pdf]

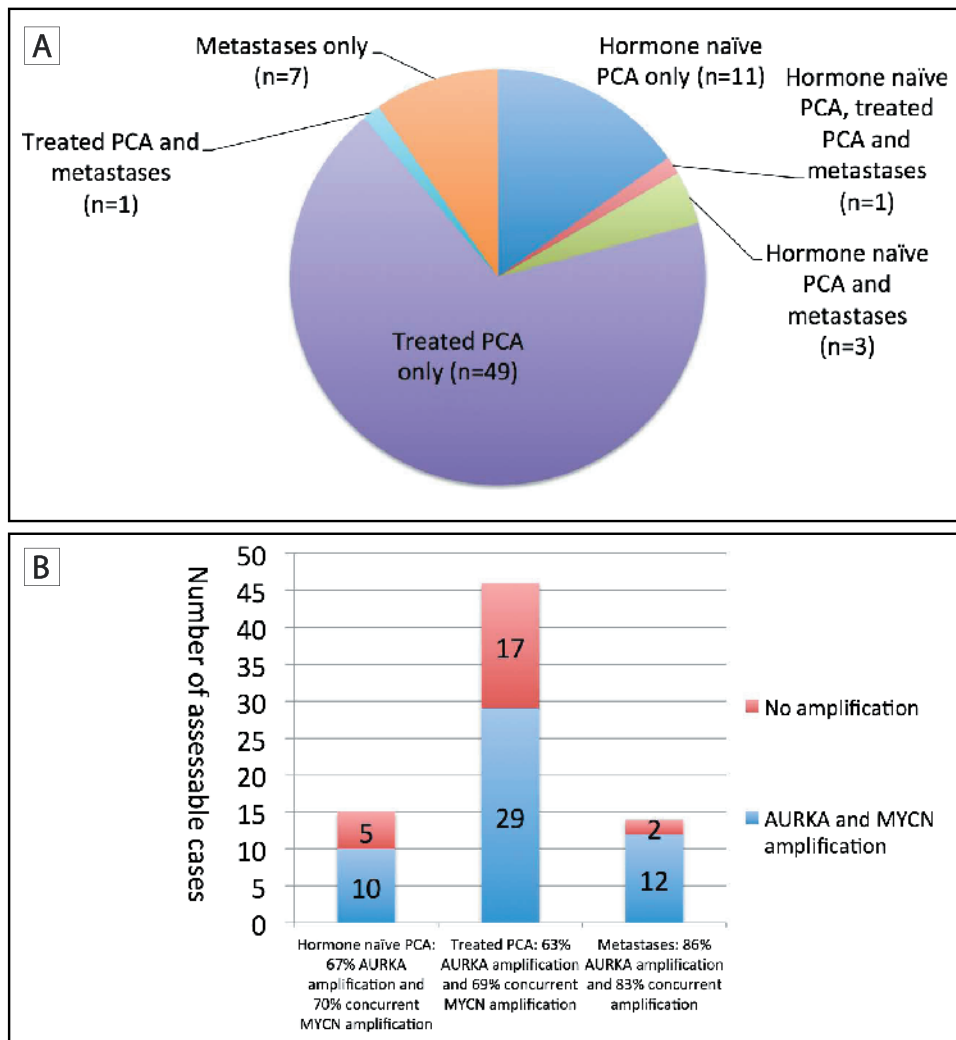

**Figure W1.** Summary of prostate cancer specimens interrogated for *AURKA* and *MYCN* gene amplifications in the current study. (A) Tumors from 72 patients at different stages of disease progression to t-NEPC were studied: 15 hormone naïve prostate cancers, 51 treated prostate cancer cases, and 15 metastases from 12 patients. Some patients had multiple specimens. (B) Results of *AURKA* and *MYCN* gene amplifications evaluated by FISH in assessable cases of hormone naïve PCA, treated PCA, and metastases.

**Table W1.** Clinicopathologic Characteristics, Treatment and Follow-up of Patients Who Developed t-NEPC.

| Case | Site                            | Clinical Course                                                                                                                                                                         | Time on Hormonal Therapy (years) | Age (years)                      | Survival (years)                      | Diagnosis                    | Pathology                                                                                                                             | FISH                |          |          |          |
|------|---------------------------------|-----------------------------------------------------------------------------------------------------------------------------------------------------------------------------------------|----------------------------------|----------------------------------|---------------------------------------|------------------------------|---------------------------------------------------------------------------------------------------------------------------------------|---------------------|----------|----------|----------|
|      |                                 |                                                                                                                                                                                         |                                  |                                  |                                       |                              |                                                                                                                                       | ERG                 | PTEN     | AURKA    | NMYC     |
| 2    | Retropertineal mass and bladder | RP 1992, XRT 1995, ADT 2000, anaplastic recurrence pelvic mass + RP lymph nodes (LN), low PSA (4 ng/ml); 2001—J591, estramustane, cytoxan, taxol, carboplatin-taxol, nizaral-adriamycin | 2                                | 76                               | 10 (14 months since dx anaplastic)    | Poorly diff AdenoCa NED      | PCA in retroperitoneal mass and bladder from cysto/transrectal prostate biopsies; s/p RP and hormonal therapy and radiation           | T                   | DEL      | AMP      | Polysomy |
| 7    | Prostate (autopsy case)         | ADT only with suppressed PSA but rapidly developed widely met CRPC to LN, stomach, iliac fossa, bladder, bone with PSA (9 ng/ml), autopsy case                                          | 2                                | 88 at dx, 90 at death            | 2                                     | Poorly diff AdenoCa          | PCA with treatment effect in prostate and multiple metastases from autopsy                                                            | T                   | DEL      | AMP      | AMP      |
| 8    | Prostate (autopsy case)         | RP 1997 (age 43), XRT, ADT, docetaxel, irinotecan, widely metastatic autopsy to liver, peritoneum, lung, LN, autopsy case                                                               | 9                                | 42 at dx, 56 at death            | 12                                    | Poorly diff AdenoCa          | PCA in prostate area and multiple metastases from autopsy                                                                             | T + D               | —        | —        | AMP      |
| 10   | Prostate                        | RP, XRT, ADT, three to four lines chemotherapy                                                                                                                                          | 2                                | dx 64                            | 13, three from mets, one from NEPC dx | AdenoCa                      | Primary PCA Gleason 7 (3 + 4) from biopsies                                                                                           | —                   | —        | —        | —        |
| 14   | Prostate (metastatic disease)   | Presented with metastatic disease 2009, PSA 33, prostate bx Gleason 4 + 4; developed CRPC 2010, ADT, MDV3100, docetaxel + radium-223                                                    | 3                                | dx age 61                        | Alive                                 | AdenoCa                      | Primary PCA Gleason 7 (4 + 3) from biopsies                                                                                           | T                   | —        | —        | —        |
| 16   | Bladder Met/Prostate            | RP 1990 for PSA 50, Gleason 4 + 3, 1/10 LN, ADT 1991—bladder recurrence 2010, PSA 0.03, elevated chromogranin 1617 and NSE 15                                                           | 11                               | 66 at dx, now 78                 | Alive                                 | AdenoCa                      | PCA with treatment effect from TURB; positive PSMA and negative PSA, CGA, and SYP                                                     | —                   | DEL      | AMP      | AMP      |
| 17   | Spinal Metastasis               | RP 1999 for Gleason 4 + 4, XRT 2000, bone mets 2004, ADT, CRPC 2007, J591, docetaxel, abiraterone x 9 months, carboplatin-taxol, cord compression and brain mets 2011                   | 7                                | dx age 56, mets age 61, death 68 | 12                                    | AdenoCa met                  | Metastatic PCA to brain and spinal cord; positive PSMA and negative PSA                                                               | —                   | —        | AMP      | —        |
| 18   | Spinal Metastasis               | XRT + ADT 2004 for Gleason 5 + 5, PSA 26, ADT, CRPC 2006, docetaxel, J591                                                                                                               | 4                                | dx age 65, died age 69           | 4                                     | Poorly diff AdenoCa          | Metastatic PCA from spinal tumor; weakly positive for PSA                                                                             | Polysomy            | Homo Del | AMP      | AMP      |
| 19   | Prostate (metastatic disease)   | ADT, cisplatin-etoposide, carboplatin-taxol, palliative XRT bone                                                                                                                        | 1                                | 56                               | 2                                     | Mixed small cell and 4 + 5   | PCA Gleason 9 (4 + 5) with ductal features and focal small cell diff. from TURP; negative PSA, and positive focal CGA and diffuse NSE | T + D               | DEL      | Polysomy | —        |
| 20   | Prostate (metastatic disease)   | XRT for Gleason 4 + 3, multiple TURPS, ADT, bone mets, liver mets                                                                                                                       | 4                                | dx age 67, NEPC age 77           | 10                                    | Mixed (small cell + AdenoCa) | PCA Gleason 10 (5 + 5) and majority of tumor consisting of small cell undifferentiated variant (90%) from TURP; primary               | del both 5' signals | Homo Del | Polysomy | —        |

Table W1. (continued)

| Case | Site                          | Clinical Course                                                                                                                                                                                                                              | Time on Hormonal Therapy (years) | Age (years)                  | Survival (years)                                 | Diagnosis         | Pathology                                                                                                                                                         | FISH          |          |       |      |
|------|-------------------------------|----------------------------------------------------------------------------------------------------------------------------------------------------------------------------------------------------------------------------------------------|----------------------------------|------------------------------|--------------------------------------------------|-------------------|-------------------------------------------------------------------------------------------------------------------------------------------------------------------|---------------|----------|-------|------|
|      |                               |                                                                                                                                                                                                                                              |                                  |                              |                                                  |                   |                                                                                                                                                                   | ERG           | PTEN     | AURKA | NMYC |
| 21   | Prostate (metastatic disease) | RP for Gleason 7 LN+ in 1996, ADT, LN/liver mets 1999 with TURP at that time t-NEPC, cisplatin-etoposide, carboplatin-taxol, pelvic RT                                                                                                       | 3                                | dx age 58, NEPC age 61       | 3                                                | Small cell Ca     | Small cell anaplastic carcinoma from TURP; negative PSA, CGA, SYP, and PAP                                                                                        | T             | -        | AMP   | AMP  |
| 23   | Prostate (metastatic disease) | RP 2006 for Gleason 5 + 4, 3/19 LN, mets 2006 with PSA 0.06, ADT, docetaxel, cisplatin-etoposide, J591, carboplatin-taxol                                                                                                                    | 5                                | dx age 54                    | Alive                                            | AdenoCa (3 + 3)   | PCA Gleason 9 (5 + 4) from RP                                                                                                                                     | T             | -        | AMP   | AMP  |
| 24   | Prostate (metastatic disease) | RP 2008 Gleason 4 + 3, pT3a, bone mets 2009, cord compression 2009 elevated chromogranin 191, NSE 23                                                                                                                                         | 1                                | 59                           | 1 diagnosis→death                                | AdenoCa (5)       | PCA Gleason 9 (4 + 5) from RP                                                                                                                                     | -             | -        | -     | -    |
| 25   | Prostate (metastatic disease) | XRT 2002 Gleason 8, ADT 2006, local recurrence 2009 NEPC, chromogranin >7000 NSE 65, cisplatin-etoposide, salvage RP 2010                                                                                                                    | 4                                | dx 2002 age 62, death age 71 | 9 (14 months NEPC to death)                      | Small cell Ca     | Undifferentiated NE carcinoma from prostate biopsies; strong CD56, moderate TTF-1; negative PSAP and PSMA                                                         | T + D         | -        | AMP   | AMP  |
| 27   | Prostate (metastatic disease) | RP, salvage XRT, intermittent ADT, R-CHOP (for lymphoma), pt later developed liver mets                                                                                                                                                      | 5                                | 59                           | 6                                                | AdenoCa (4 + 3)   | Primary PCA Gleason 7 (4 + 3); liver metastasis with NEPC                                                                                                         | T + D         | -        | AMP   | AMP  |
| 30   | Pleural metastasis            | XRT 1989, treated ADT 1990s, docetaxel, abiraterone—liver, lung, and pleura mets with low PSA (8 ng/ml), carboplatin-paclitaxel                                                                                                              | 10                               | dx age 71, NEPC age 81       | 22 from dx to death, 8 months from NEPC to death | Small cell Ca met | Small cell carcinoma                                                                                                                                              | T + D, ploidy | -        | AMP   | AMP  |
| 74   | Prostate (metastatic disease) | Intermittent ADT 1992, XRT, DES, docetaxel + CNTO, docetaxel + revlimid, ipilimumab <i>versus</i> placebo, cabazitaxel, then abiraterone, cytopenias despite dropping PSA, BM c/w NEPC, rapidly progressed and died in hospice 1 month later | 10                               | dx 51, died 71               | 20                                               | AdenoCa           | Well-differentiated adenocarcinoma; TURP specimen, confirmed primary PCA Gleason 6 (3 + 3) and 8 (4 + 4) in biopsies from 1993, bone metastasis in 2011 with NEPC | T             | Homo Del | AMP   | AMP  |
| 75   | Prostate and pelvic mass      | XRT + ADT 2008 for Gleason 4 + 4; developed local recurrence 2011, NEPC 6.6 × 5.2 cm pelvic mass with local ext to bladder/colon, carboplatin/etoposide                                                                                      | 4                                | dx 75                        | Alive                                            | AdenoCa (4 + 4)   | Primary PCA Gleason 8 (4 + 4) and 6 (3 + 3), biopsies                                                                                                             | -             | -        | AMP   | AMP  |

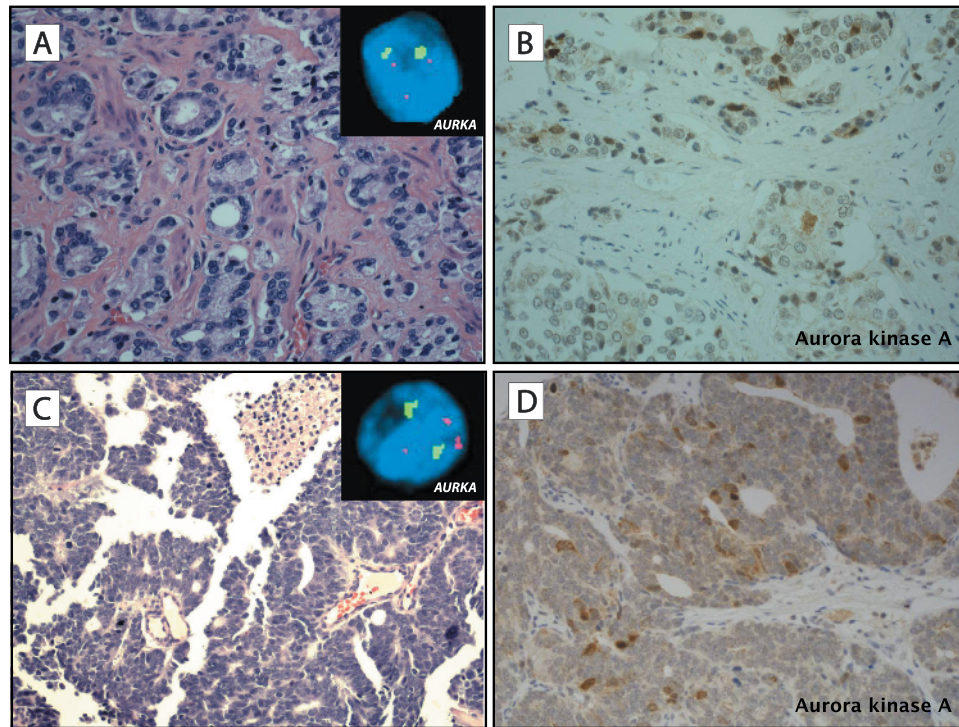

**Figure W2.** Aurora kinase A overexpression is present in primary PCA with *AURKA* amplification from patients who later developed t-NEPC. Aurora kinase A overexpression by IHC was detected in five of seven primary PCAs with *AURKA* gene amplification from patients who clinically develop t-NEPC. Illustrated here are two of such cases. (A) Primary prostatic adenocarcinoma, Gleason score 4 + 3 = 7 with *AURKA* amplification (inset) from a 59-year-old patient who, 6 years after initial diagnosis, developed t-NEPC. (B) Overexpression of Aurora kinase A is present. (C) Primary prostatic adenocarcinoma, Gleason score 5 + 4 = 9 with *AURKA* amplification (inset) from a 65-year-old patient who, 9 years after initial diagnosis, developed t-NEPC. (D) Overexpression of Aurora kinase A is present (H&E and IHC stains of A and B, original magnification,  $\times 400$ ; H&E and IHC stains of C and D, original magnification,  $\times 200$ ; FISH images, original magnification,  $\times 600$ ).
